# Supplementary material for: DNA methylation markers predict recurrence-free interval in triple-negative breast cancer
Source: PubMed Central journal article supplement (PMC6994477; doi:10.1038/s41523-020-0145-3), 2020-01-31
Supplement: 41523_2020_145_MOESM1_ESM.pdf [file 41523_2020_145_MOESM1_ESM.pdf]

1 Supplementary Figures & Tables

2 **Supplementary Figure 1: Percentage of array probes passing QC.** Individual samples were  
3 evaluated for overall performance. Shown is the percentage of probes with Detected CpG  $p \leq$   
4 0.01 (high probe performance), data extracted from the Sample Table within GenomeStudio.  
5 Samples with low performance ( $> 2.5$  SD below the mean), shown below the horizontal line,  
6 were removed. The table at right of each graph shows the descriptive statistics of the sample set.

7 **Supplementary Figure 2: Marker Selection Strategy.** Recurrence-associated probes were  
8 identified using the Discovery Set of TNBC tumors (T) from patients who received loco-regional  
9 therapy only (IBCSG Test Set #1). Normal breast tissues (N = 5; NBr) served as controls.

10 Markers were filtered in a step-wise progression, as indicated.

11 The final marker set of 100 and a subset consisting of 30 markers identified based on the  
12 Discovery sample set only.

13 **Supplementary Figure 3: Principal Component Analysis (PCA)** was performed to visually  
14 inspect the methylation status of CpG loci probes among recurrent (blue ellipsoid) tumors versus  
15 non-recurrent tumors (brown ellipsoid). Each dot is an individual sample (Normal Breast  
16 samples, green,  $n = 5$ ; tumor, red,  $n = 115$ ) and represents the average methylation status across  
17 the CpG loci. A. 460,772/485,577 total CpG probes (detection  $p$ -value  $< 0.01$ ). B. 59,581 cancer-  
18 specific probes (mean ratio Tumor/Normal samples  $\geq 1.5$ ), 12% of total CpG probes.

19 The scale for the axes is the same as in A). X- and Y- axes are re-scaling to enable closer visual  
20 inspection of the ellipsoids.

21 **Supplementary Figure 4: Hypermethylation of 100 and 30 Marker Sets in Recurrent versus**  
22 **Non-recurrent Breast Cancers.** The sum of beta array methylation for each 100 marker set and  
23 the 30 marker subset was calculated and displayed as box/whiskers plots (minimum to

24 maximum). For the test cohorts, the Mann-Whitney test was used to compare methylation levels  
25 among primary breast cancers that were Recurrent (R) versus Non-recurrent (NR).

26 **Supplementary Figure 5: Cross-Platform Technical Validation of the Methylation Array.**

27 Quantitative Multiplex Methylation Specific PCR (QM-MSP) was performed using a 9 CpG  
28 markers chosen from the 30 marker set according to their overall frequent hypermethylation in  
29 both the Discovery and IBCSG NoChemo Test arrays. Spearman Correlation shows strong  
30 correlation between array and QM-MSP methods.

31

32 **Supplementary Table 1. 100 CpG Recurrence Markers Selected in the Discovery Cohort.**

33 **Supplementary Table 2. Chromosomal Localization of Methylated CpG Loci in the**  
34 **Combined Chemo Group.** Logistic regression p-value is based on median methylation for each  
35 individual CpG locus of the 30 marker set in the combined IBCSG + Institutional Chemo cohort  
36 (26 cases and 95 controls). Correction for multiple testing was not performed.

37 **Supplementary Table 3. Enrichment of CpG Loci Located on Chromosome 19.**

38

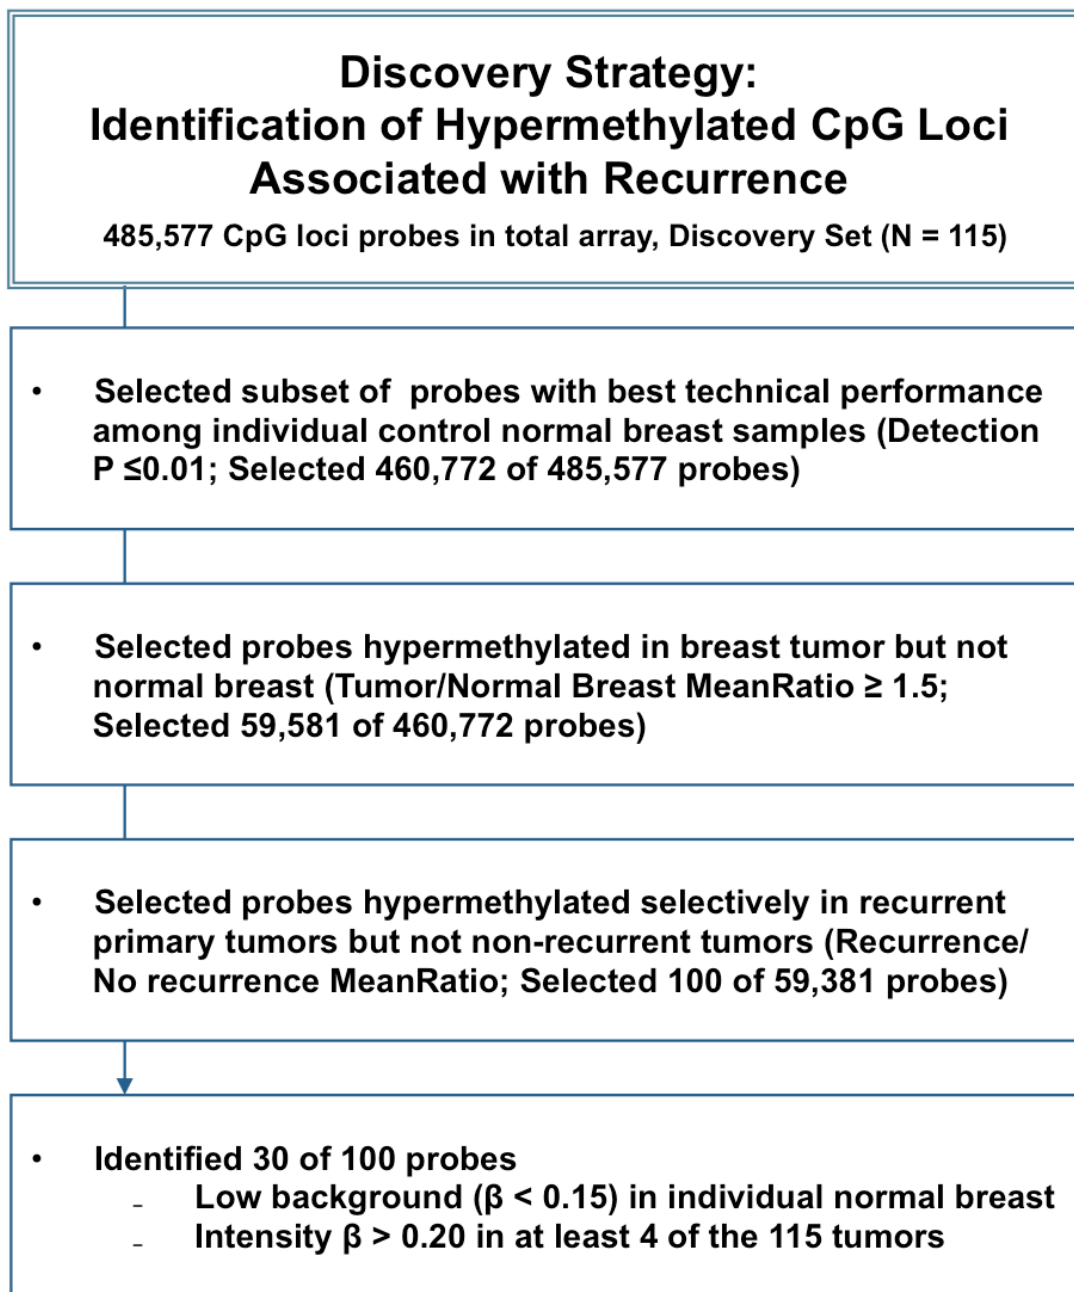

Supplementary Figure 2.

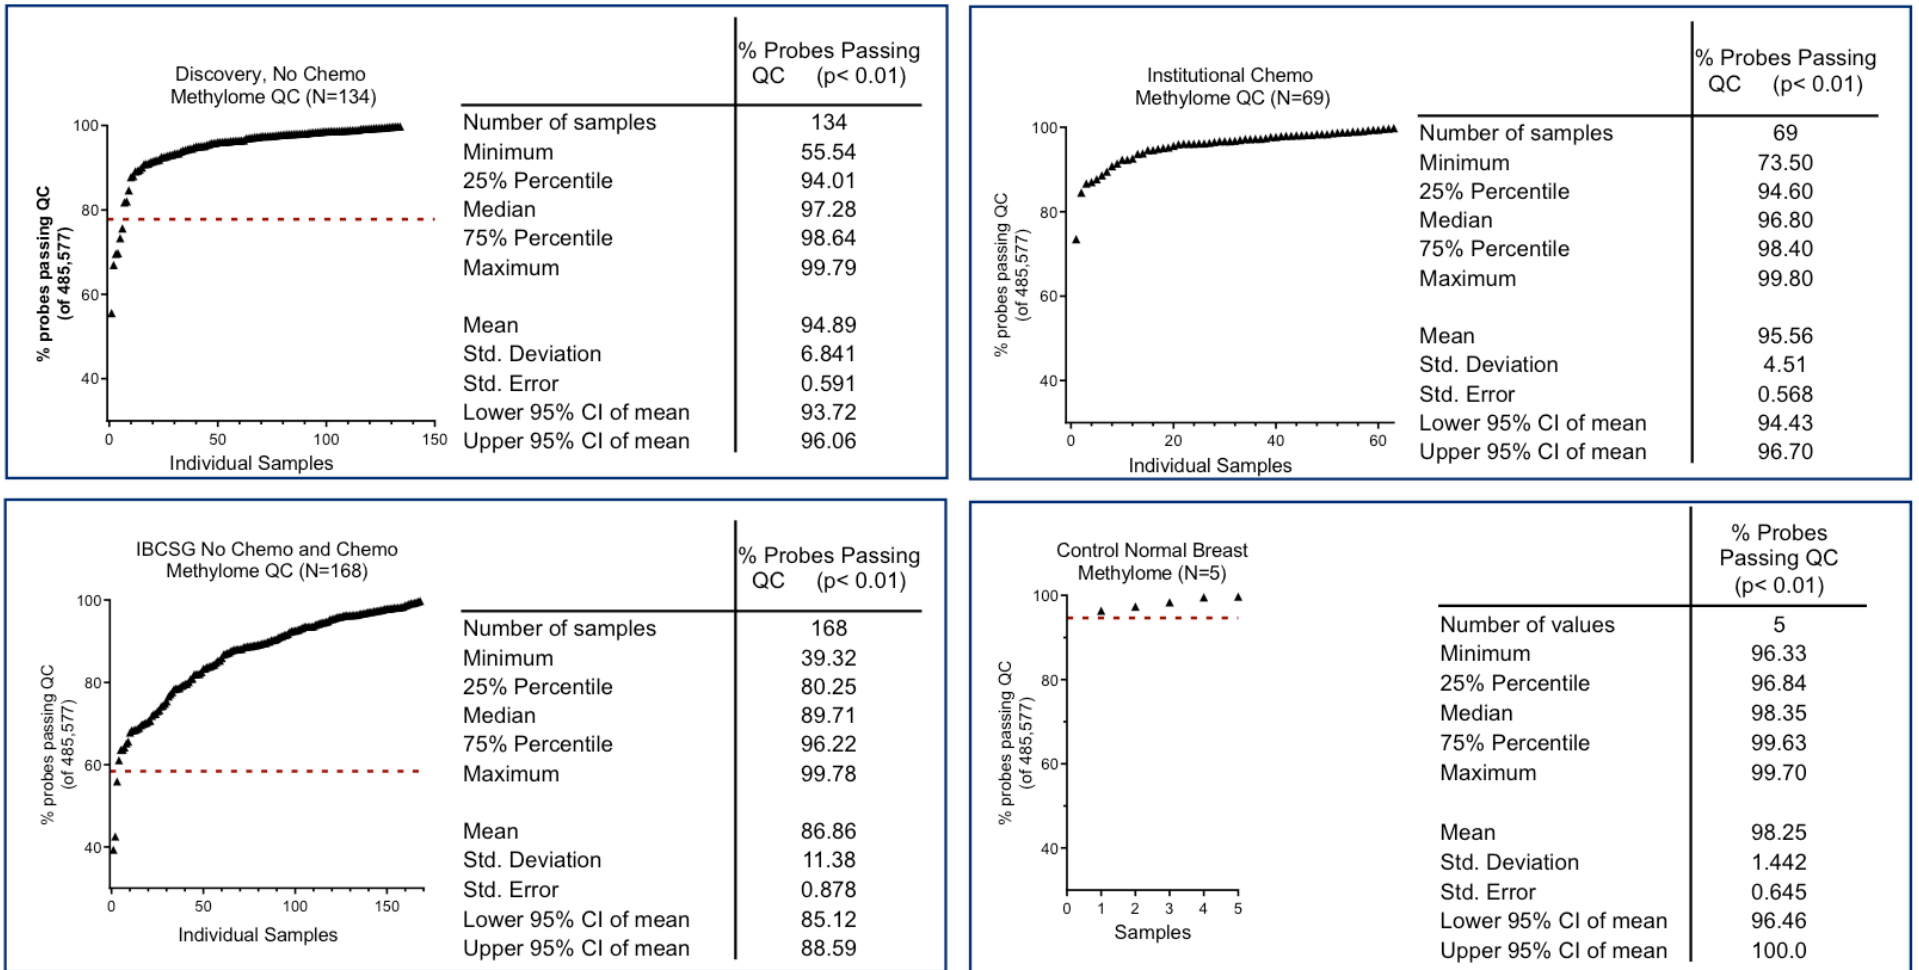

----- 2.5 SD threshold

Supplementary Figure 3.

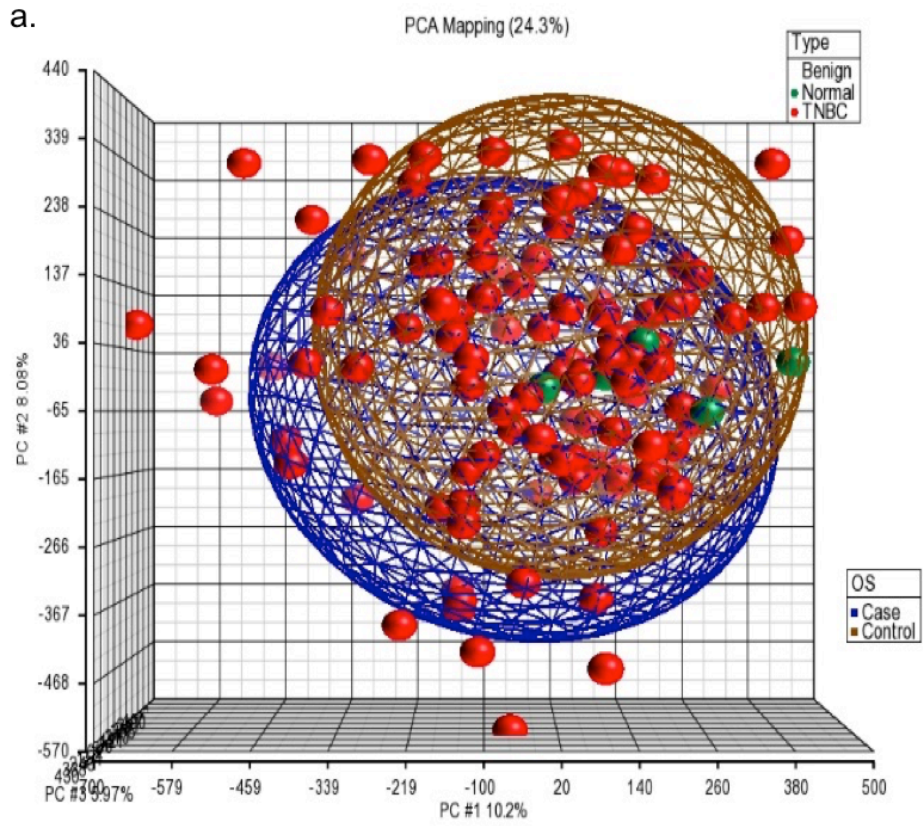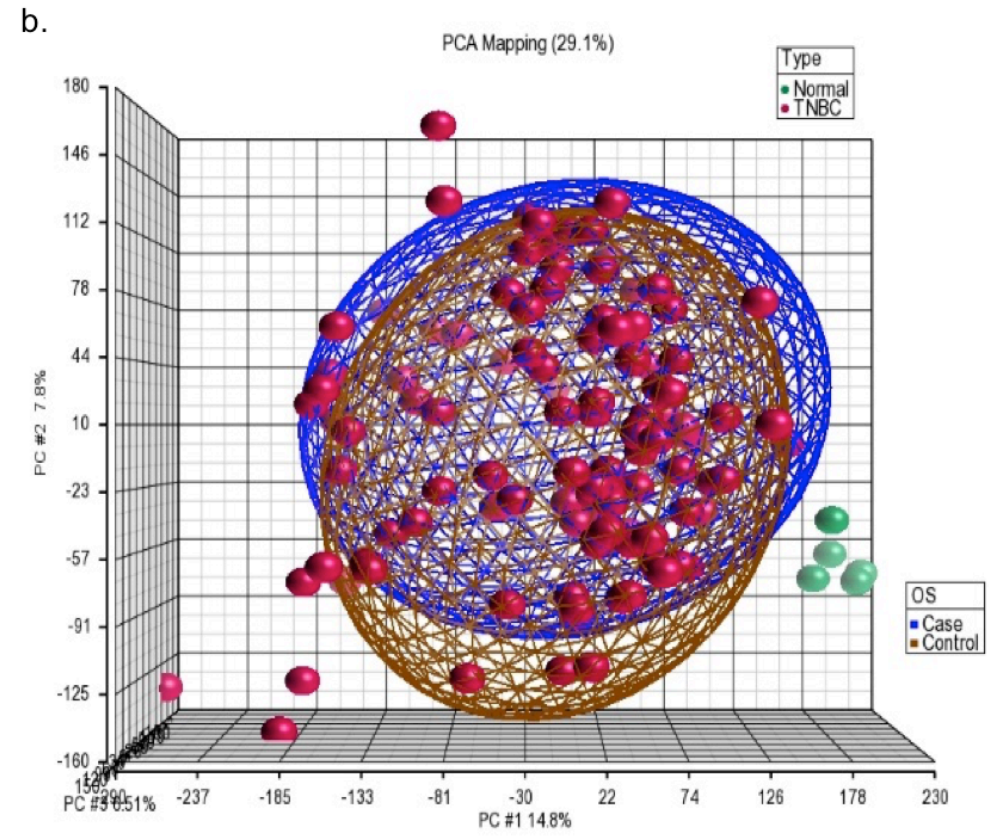

Supplementary Figure 4.

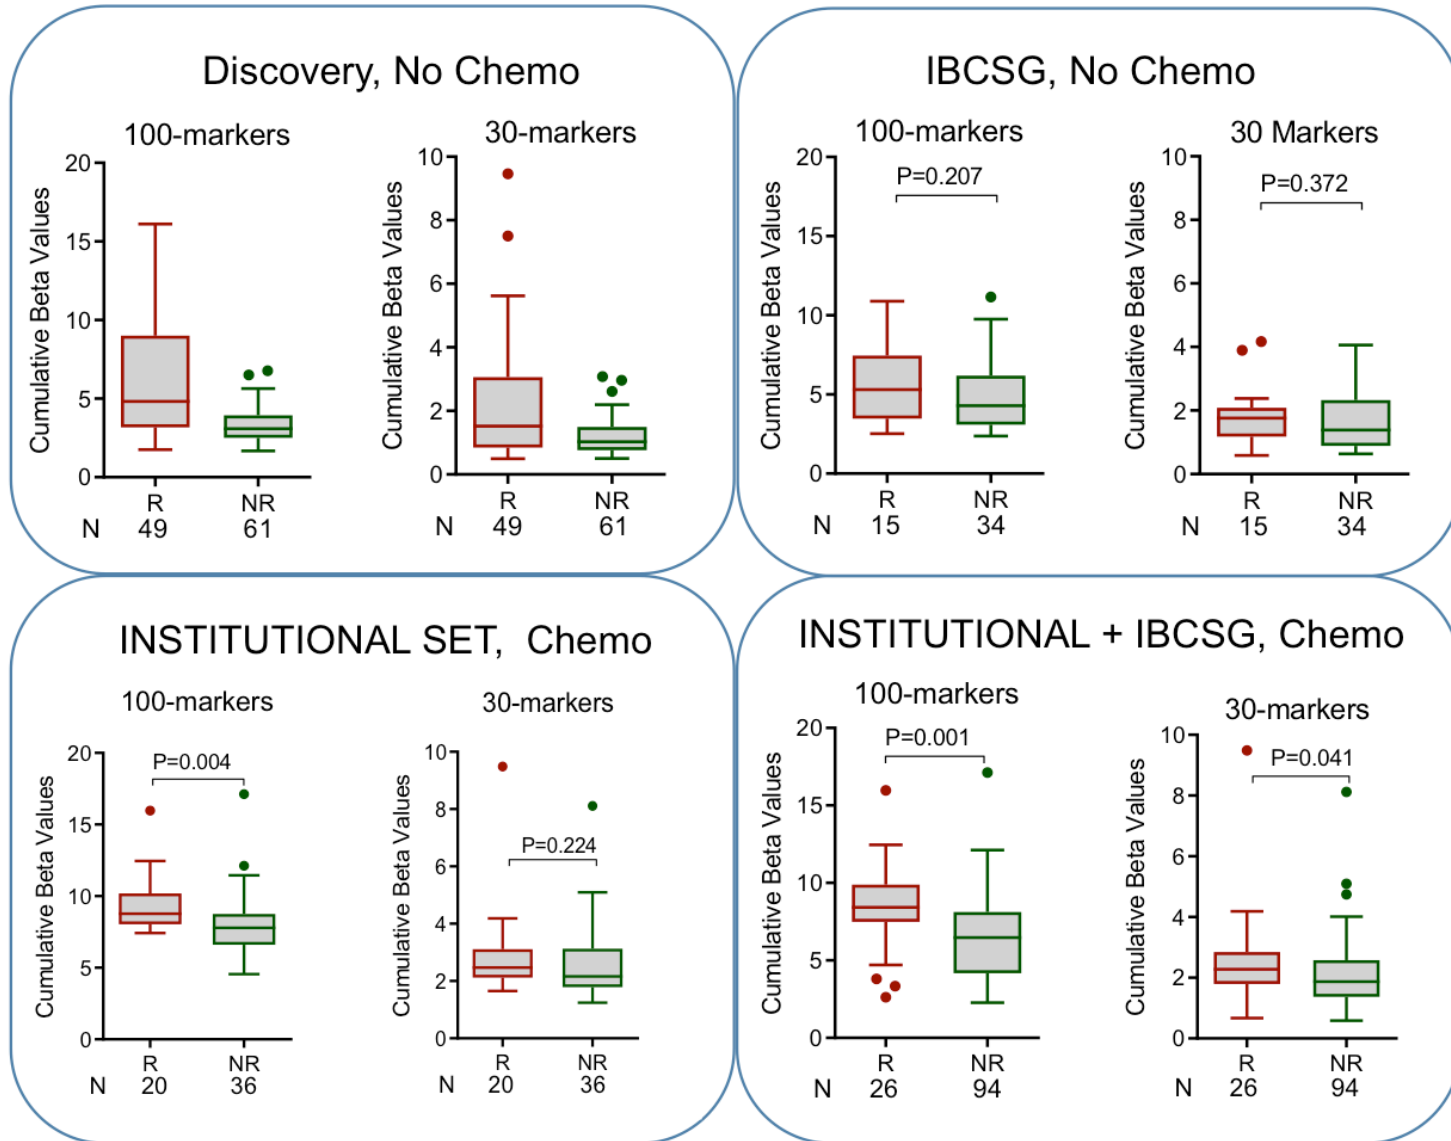

Cross- Platform Validation of the Methylation Array –  
 IBCSG No Chemo samples  
 (12 recurrences; 30 controls)

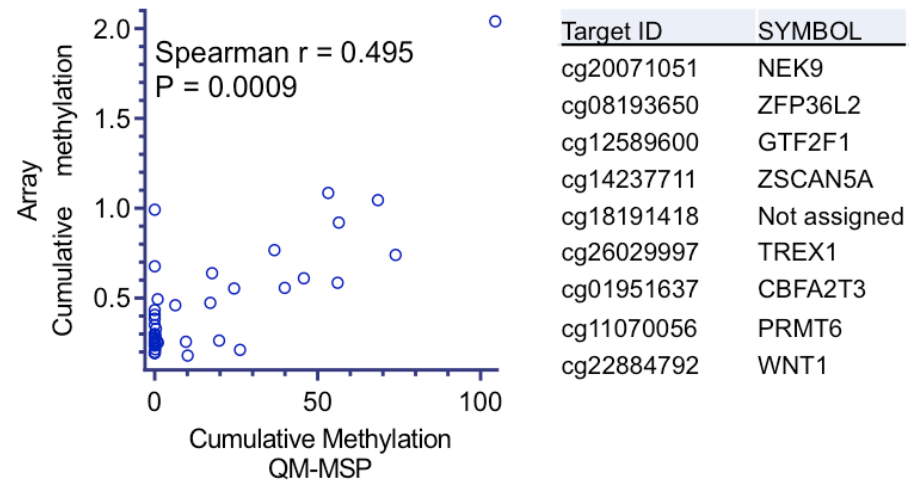

Supplementary Table 1.

Table S1 100 CpG Recurrence Markers Selected in the Discovery Cohort

| TargetID   | SYMBOL       | Ratio Mean<br>β R/NR | R<br>β-value* | mean<br>β-value* | NR<br>mean value* | β            | CpG Island | REGULATORY<br>FEATURE | CHR | GENOMIC<br>LOCATION                              | In 30<br>Marker<br>Set | GENOMIC SOURCESEQ |
|------------|--------------|----------------------|---------------|------------------|-------------------|--------------|------------|-----------------------|-----|--------------------------------------------------|------------------------|-------------------|
| cg1000656  | SPATA1       | 2.648                | 0.032         | 0.012            | Island            | Promoter     | 1          | 84971486              |     | AGCAGGCGCCGGCTGGTTCACGCTGTGTTTGGGGGACAGTATGTTCC  |                        |                   |
| cg17750334 | CENPF        | 2.147                | 0.028         | 0.013            | Island            | Promoter     | 1          | 21477613              |     | CGCGCAGAACTGACTTCCGAGAGCTGTTTCCGCGCCGAGAGCA      |                        |                   |
| cg25277534 | DDAH1        | 2.000                | 0.043         | 0.021            | Island            | Unclassified | 1          | 85930476              |     | CGCACACCACGGCCAGCTCCACGAGACGCGATCCAGGAGGAGCTG    |                        |                   |
| cg1819850  | OBSCN        | 1.839                | 0.029         | 0.016            | Island            | Promoter     | 1          | 228401278             |     | GTCCACTGAGCCCGGTTCACAGGAGAGCCGGTTGGGGGAGCGG      |                        |                   |
| cg11070056 | PRMT6        | 1.738                | 0.074         | 0.042            | Island            | Unclassified | 1          | 107600091             |     | TCCAGCTCTGCTCAAGCGCGCGGGAGAGCTCTAGCTGAGCAAGCG    |                        |                   |
| cg07914309 | RGS2         | 1.706                | 0.026         | 0.015            | Island            | Promoter     | 1          | 192778123             |     | TTGGCGTGGGCGTGGCTGGCAGCATTTAGAGCCCTGGCTGGGGGG    |                        |                   |
| cg13904493 | KIAA1804     | 1.692                | 0.037         | 0.022            | Island            | Unclassified | 1          | 23484194              | Yes | CGCGGTACACCTGCCCGAAGCGCCGAGCGGATGATGCTCTCAGCTC   |                        |                   |
| cg09897416 | HIST2H2AB    | 1.677                | 0.034         | 0.020            | Island            | Promoter     | 1          | 149859252             |     | CGGACAACAGAGAGCGGCATCATCTCGCTGCGCATCGCAACTGCGCT  |                        |                   |
| cg19769760 | POU3F1       | 1.656                | 0.075         | 0.046            | Island            | Unclassified | 1          | 38511105              |     | GGGTCTACTGCACTGAGCCGGGCGATGTGTGTGGTGGTGGTGGCAAG  |                        |                   |
| cg17079378 | RAD54L       | 1.640                | 0.045         | 0.028            | Not assigned      | Promoter     | 1          | 46713440              |     | TTTGATTGACCGGTCTTGGGGGTGGTGGTGGTGGTGGTGGTGGTGG   |                        |                   |
| cg04458869 | LASS6        | 3.011                | 0.039         | 0.013            | Island            | Promoter     | 2          | 169312887             |     | GCCTCGGGGTGGGGGAGTGGCCGCTGTGTGCCCTGGCTTTGACG     |                        |                   |
| cg08193650 | ZFP36L2      | 2.567                | 0.093         | 0.036            | Island            | Unclassified | 2          | 43451868              |     | GCCTCAACAGCTTCCGCTTCCGTCGGGAGCTCAGCAGCTCATCAGC   |                        |                   |
| cg08535260 | Not assigned | 2.302                | 0.055         | 0.024            | Island            | Unclassified | 2          | 127643971             |     | CGGGCCATCAACAGAGCCCAAGAGCCCTCGCGGCTTTCAGGGGG     |                        |                   |
| cg00878630 | COPS7B       | 1.944                | 0.048         | 0.025            | Island            | Promoter     | 2          | 232651109             |     | GGTGAACCTTGTGGGGGGAACCGAGTGCAGCGGTGGGGAGCTGCC    |                        |                   |
| cg01987515 | COPS7B       | 1.936                | 0.051         | 0.026            | Island            | Promoter     | 2          | 232651086             |     | CGCGTTCGGCCACAAAGGTTCCACCGCGGCTTACAGACTCTCCAG    |                        |                   |
| cg02943303 | EIF5B        | 1.765                | 0.099         | 0.056            | Island            | Promoter     | 2          | 99952887              |     | ACCTTGGGTTCCGGGCTGTGGGGGGAGGGCAGCGGCGAGAACTGCTG  |                        |                   |
| cg1162249  | NUDT16       | 1.941                | 0.042         | 0.022            | Island            | Promoter     | 3          | 131100713             | Yes | CGCATGACCGAGCCGAGCCAGCCAGCGGCGCTCGCTAGCTGCCAGC   |                        |                   |
| cg18191418 | Not assigned | 1.833                | 0.095         | 0.052            | Island            | Promoter     | 3          | 128336579             |     | AACACTCGCGCAGCTCACAGGGCGCCACCGGAGTATGGGCGAAATCG  |                        |                   |
| cg26029997 | TREX1        | 1.801                | 0.072         | 0.040            | Not assigned      | Promoter     | 3          | 48507610              | Yes | CGGCGCCAGCCCAAGTTCACTCCCGCACTTCCGCGCTGCACGAGCGTC |                        |                   |
| cg17285536 | OGG1         | 1.725                | 0.043         | 0.025            | Island            | Promoter     | 3          | 9791531               |     | CGCGTCAGAAGCGCCGCCACCTGATTTTCAATTGGCGCTCCTACCT   |                        |                   |
| cg02510164 | MCF2L2       | 1.703                | 0.046         | 0.027            | Island            | Promoter     | 3          | 183146421             |     | CTTACTCGGAACCTGGGGGGGGAGACAGTGAATGAGGCGCTCCAGCTG |                        |                   |
| cg05585810 | RAP2B        | 1.699                | 0.039         | 0.023            | Island            | Promoter     | 3          | 152880101             |     | CGCGCAATAGCAGCCACCTCCGACCGCCCGCCGCTCCGCTCCCGC    |                        |                   |
| cg24623434 | RPP14        | 1.632                | 0.060         | 0.037            | Island            | Promoter     | 3          | 58291823              |     | AGCCGTGTGTCAATTTGCTGGGGTGGCTTTAGGCGGGTTTTCGCG    |                        |                   |
| cg22958231 | PAT4         | 1.645                | 0.054         | 0.033            | Island            | Promoter     | 4          | 17116835              |     | GCCCGCGCTCAAATCTGAGTAAAGCGAGTCCGCGGCTGCCTGCG     |                        |                   |
| cg20007130 | DCHS2        | 1.634                | 0.056         | 0.034            | Island            | Unclassified | 4          | 155413075             |     | AGGCAGGCGGCGAGGCTGGTGGAGGAGGAGTGGCGGCTCCGCTGGG   |                        |                   |
| cg23429847 | ISOC1        | 1.632                | 0.037         | 0.023            | Island            | Promoter     | 5          | 128430259             |     | CGGCGAGGCGGGCGCGGCTGAAGGCTGAAGGCTGGGCTGGGAGTGC   |                        |                   |
| cg25211525 | C6orf145     | 2.012                | 0.034         | 0.017            | Island            | Unclassified | 6          | 3751739               |     | CGTGCCCTCAACACCCTGAGGAGCTGTGCACGATGCCCGCCAAAG    |                        |                   |
| cg11927033 | PKIB         | 1.930                | 0.038         | 0.020            | Island            | Promoter     | 6          | 122793073             |     | GCCTGGTAGTAAAACACCGAGCGCGAGCTGAGACTGGCGACTG      |                        |                   |
| cg18894128 | Not assigned | 1.831                | 0.087         | 0.047            | Not assigned      | Unclassified | 6          | 31409575              | Yes | GCCTGTCCCGAAAGCGCTCACTGAGCTCCAGAGAGCTGGCGGGCG    |                        |                   |
| cg03300581 | CNR1         | 1.831                | 0.037         | 0.020            | Island            | Unclassified | 6          | 88875844              |     | GAGTGGGTGTGCTCCGCGGGCGGTCAAGCACTGCTGCTCCGAGCTG   |                        |                   |
| cg06512858 | SOX4         | 1.799                | 0.044         | 0.025            | Island            | Promoter     | 6          | 21596796              |     | AAGGCTCCGGGTGACGAATTTGGCGTGAAGTCCGCGGCTGCCTGCG   |                        |                   |
| cg19861329 | FOXO3        | 1.789                | 0.045         | 0.025            | Island            | Unclassified | 6          | 108881880             |     | GCCCGGTCAGAGCCCGAGCTGGTGTGGTGGTGGTGGTGGTGGTGG    |                        |                   |
| cg18418460 | ULBP3        | 1.656                | 0.052         | 0.031            | Island            | Unclassified | 6          | 150390014             |     | AAAGACAGCAATCGAACTGAGCTGAGCGTGGGGGCGGCTGGGAGTCCG |                        |                   |
| cg15816080 | TPST1        | 2.032                | 0.030         | 0.015            | Island            | Promoter     | 7          | 65670215              |     | ACATCTGCTAGATTGGCTGAGCGGACGATGTGGCGCTGTGATTGG    |                        |                   |
| cg23755113 | TPST1        | 1.807                | 0.046         | 0.026            | Island            | Promoter     | 7          | 65670237              |     | CGTCGCTCAGCAATGATGATGATGTGATCCCGCACTCCCGGGA      |                        |                   |
| cg22813794 | STYXL1       | 1.767                | 0.153         | 0.087            | Island            | Promoter     | 7          | 75677469              |     | GGAGAGCAGCGTGGCAGCGCGGGGAGGGCGAGAGTGCAGGAGCG     |                        |                   |
| cg24133836 | AASS         | 1.677                | 0.085         | 0.051            | Island            | Unclassified | 7          | 121784386             | Yes | CGCCCTGAGGAAACAACTTCTCATCTGCCAATCGGCGGCGCTCCAGT  |                        |                   |
| cg03184037 | WRN          | 2.246                | 0.109         | 0.048            | Not assigned      | Unclassified | 8          | 30891338              |     | TGGAGGGCGGGTGGGTAGTGTCTCCGGCGTGGCTGATGTGGTGGG    |                        |                   |
| cg10594709 | Not assigned | 1.988                | 0.108         | 0.054            | Island            | Unclassified | 8          | 14448958              | Yes | GCAAGGCGTGGGGGTAGGAGCGCGAGCGGGGGCTGAGTATGGCG     |                        |                   |
| cg02196694 | TOX          | 1.692                | 0.126         | 0.075            | Island            | Unclassified | 8          | 80031540              | Yes | GAGCTGTGGGCGAGCGGGGCTGGGCTGAGGAGGAGTGAATTTACG    |                        |                   |
| cg01556929 | VPS28        | 1.689                | 0.033         | 0.019            | Island            | Promoter     | 8          | 145654081             |     | CGCGGTCGGCGGGTAAGCAGCGGCTCGACTGCTGCGCCGTTCAG     |                        |                   |
| cg25336579 | PSAT1        | 1.883                | 0.037         | 0.019            | Island            | Unclassified | 9          | 80912260              |     | CGCAGGATGCAAAACCCCGCGGTGGTGTCTCCGCTGAACCTCAGCT   |                        |                   |
| cg18435900 | ZNF485       | 2.499                | 0.027         | 0.011            | Island            | Unclassified | 10         | 44101962              |     | CGCCAGAGAGTCAAGCAGCACACCCAGCGCGGCGAGAGCTCCAGCG   |                        |                   |
| cg10107304 | C10orf26     | 1.923                | 0.111         | 0.058            | Not assigned      | Promoter     | 10         | 104503664             |     | GAAAGCGTGAACCGAGATCTCTCCGCTTCTGGGAGGAGTGTGGTGG   |                        |                   |
| cg05739190 | CCHN         | 1.675                | 0.052         | 0.031            | Island            | Promoter     | 10         | 97803386              |     | TTAAATGGGCGCGGCGAGCTCCAGCGTGGGCTTACGCTAGTGGGGCG  |                        |                   |
| cg18977061 | PTPLA        | 1.625                | 0.038         | 0.024            | Island            | Promoter     | 10         | 17659544              |     | CGCTCCGAGGAAAGTGCACCCGCTTCCGCTGCTGGCGGCGCTCTCC   |                        |                   |
| cg19948397 | C11orf61     | 2.363                | 0.032         | 0.013            | Island            | Unclassified | 11         | 124670177             |     | CGAAATCATCTGCTCCGACCTTCCGAGCTCCGCGCTGGGCTGAGGAG  |                        |                   |
| cg09602577 | C11orf61     | 1.962                | 0.037         | 0.019            | Island            | Unclassified | 11         | 124669905             |     | AGACAACGCGCTCACTGCACTGTTGGGGCAACGAGCGCTGTGGAGCG  |                        |                   |
| cg26583055 | C11orf61     | 1.780                | 0.047         | 0.027            | Island            | Promoter     | 11         | 124670419             |     | CGCCGCGGAGCCATCTCAGCAGCAGAGACCCGAGCCATCCGCGCG    |                        |                   |
| cg04767207 | VPS37C       | 1.779                | 0.069         | 0.039            | Island            | Promoter     | 11         | 60929031              |     | GGCGCGGAGGCGTGTGTGGTGGCAGATGCTGGTGAATCCAGAGGCG   |                        |                   |
| cg19899312 | Not assigned | 1.755                | 0.078         | 0.044            | Island            | Unclassified | 11         | 76757278              | Yes | TGTGTGGGATGCGGGGTGGCGGGTGGCGGGTGGCGGCTGCGCCCTGG  |                        |                   |
| cg01885963 | ZNF215       | 1.706                | 0.131         | 0.077            | Island            | Promoter     | 11         | 6947628               |     | CACCTGAGTCCATTCACAGGCGCAAGTTTCGAACTGTGGCGTGGGCG  |                        |                   |
| cg2449148  | TMEM216      | 1.642                | 0.066         | 0.040            | Island            | Unclassified | 11         | 61160132              |     | CGGCGCATCTTCACTCCGCGGAGCAGTCCGCTGCAAGCAGCGGCTCCG |                        |                   |
| cg01703419 | Not assigned | 2.437                | 0.051         | 0.021            | Island            | Unclassified | 12         | 100297587             | Yes | CTGGCGGGCGGCGCAACCTGGTGGCGTGGCGTGGCGTGGCGGCGCG   |                        |                   |
| cg24677744 | Not assigned | 2.038                | 0.051         | 0.025            | N_Shore           | Unclassified | 12         | 29302016              |     | AGTGGATCCGCTGGTCTGAACGAGTGAAGCGCGGGCGGCGCTCGCG   |                        |                   |
| cg14262439 | TMEM32B      | 2.034                | 0.120         | 0.059            | Island            | Unclassified | 12         | 126018155             | Yes | CGCCACGAGGCTCTCCCGGAGGAGCGGATGCCAATCAAATGATCC    |                        |                   |
| cg22884792 | WNT1         | 1.716                | 0.051         | 0.030            | Island            | Unclassified | 12         | 49371987              | Yes | CGCCGCTCACTCAGCTGAGCGTCCGGGCGGAGCGCTGGAGACTGAGCC |                        |                   |
| cg10360769 | LCC38799     | 1.715                | 0.055         | 0.032            | N_Shore           | Promoter     | 12         | 122240872             |     | CGCGCGCAACTAGCGCGGCTCTATAGGGCTGAGTTATAGAGC       |                        |                   |
| cg26197220 | TSC22D1      | 2.070                | 0.035         | 0.017            | Island            | Unclassified | 13         | 45150229              |     | CGCCCGGCTACCCAAACAAATGACCAACCGGCTGAGTCCAGCGGCGCG |                        |                   |
| cg15608786 | SLAIN1       | 1.682                | 0.044         | 0.026            | Island            | Unclassified | 13         | 78271880              |     | CGGCGGGCGCGCACCAACGAGCTGATGCAATGCTCAGTGGTGGGCG   |                        |                   |
| cg20071051 | NEK9         | 2.611                | 0.080         | 0.031            | Island            | Promoter     | 14         | 75593943              | Yes | CGGGAACAGGCGCTACAGCTGAGCGGCTCTCGGGTCTATGACCTC    |                        |                   |
| cg08847533 | NEK9         | 2.561                | 0.072         | 0.028            | Island            | Promoter     | 14         | 75593920              | Yes | CTGCAAGTGAAGGCTCGGCTAGGTTGGCGGCGGCTGGGGAAGCC     |                        |                   |
| cg09944325 | NEK9         | 2.159                | 0.109         | 0.051            | Island            | Promoter     | 14         | 75593969              |     | CGCTGGAACCGAAGGCTCCCGGCAACAGGCGCTCACTGAGGATGCG   |                        |                   |
| cg01141940 | RTN1         | 1.850                | 0.120         | 0.065            | Island            | Unclassified | 14         | 60097247              | Yes | CGGCGAGCCCAAGCCCGCAGCAGTGCAGCGCTCGGATTCACACAA    |                        |                   |
| cg01992424 | NEK9         | 1.713                | 0.116         | 0.068            | Island            | Promoter     | 14         | 75593964              |     | GAAAGCGGTGAACCGAAGGCTCCCGGGAACAGGCGCACTGAGC      |                        |                   |
| cg10174687 | FAM98B       | 3.222                | 0.081         | 0.025            | Island            | Promoter     | 15         | 38746780              |     | TGGGCTAGCTCGCGCCGAGGATGATTTGTGTGACTGATCTGCGG     |                        |                   |
| cg21595526 | GABPB1       | 2.449                | 0.036         | 0.015            | Island            | Unclassified | 15         | 50647267              |     | CGGCGCGCTACACAAAGCGTCACTGAGCGGAGCGGCTATTTTCG     |                        |                   |
| cg03355298 | B2M          | 2.216                | 0.044         | 0.020            | Island            | Promoter     | 15         | 45003704              |     | CGCGCACTCCACTTATTAACGCGTCCGCAAGCAGTCCGCTGGCGTGC  |                        |                   |
| cg06917634 | PSMA4        | 1.755                | 0.041         | 0.023            | Island            | Unclassified | 15         | 78832804              |     | ACCAGCGGTTGTGGCATGGCGGGGGCAATTAAGCAGCGTATTGCG    |                        |                   |
| cg06842781 | NDNL2        | 1.715                | 0.019         | 0.011            | Island            | Promoter     | 15         | 29520777              |     | GTGCTGCTGAAGGCTCGGCTGTGGTGGTGGTGGTGGTGGTGGTGG    |                        |                   |
| cg24451981 | BUB1B        | 1.706                | 0.063         | 0.037            | Island            | Promoter     | 15         | 40453319              |     | TGGGCTTGGTGGCGGTTGTTAGGAGGCTGTGACTGCTGCTGGTGG    |                        |                   |
| cg15671705 | ALDH1A3      | 1.682                | 0.036         | 0.021            | Island            | Unclassified | 15         | 101419479             |     | GCTCGGCGGAGTGGGGGCGGAGGCGGCTGTGCTGCTGACTGGAGG    |                        |                   |
| cg01951637 | CBFA2T3      | 1.798                | 0.088         | 0.049            | Island            | Unclassified | 16         | 89007466              | Yes | GGACCAAGCTGGAAGAGGAGCAGCGACTCCCGCGGCTGGAGGAGTGGC |                        |                   |
| cg08547343 | CENPB1       | 1.685                | 0.058         | 0.034            | Island            | Promoter     | 16         | 90038815              |     | CGCCTTAGACTTATCTAAATCGGCTGCGGCTCAACACTTATTTCTG   |                        |                   |
| cg09876101 | WDR90        | 1.668                | 0.031         | 0.019            | Island            | Promoter     | 16         | 699357                | Yes | GTAATGGCGAAGTGGCGGCTGCGGAGCGGCTGCTGCTGGCGTGGC    |                        |                   |
| cg02727363 | EXOSC6       | 1.655                | 0.053         | 0.032            | Island            | Promoter     | 16         | 70284928              |     | TTCCAGAACTTCTGACGCAAACTGGAGGCGGCTGGCGGGGTCTTTG   |                        |                   |
| cg0688900  | GGNBP2       | 2.212                | 0.041         | 0.018            | Island            | Promoter     | 17         | 34901364              |     | CGCTGGGCGGCTGTTGGCTGAGCGTGTGGTGAATGCGGCTGGGGAAG  |                        |                   |
| cg02392688 | GIT1         | 2.159                | 0.041         | 0.019            | Island            | Unclassified | 17         | 27916351              |     | GAGGATGCCGAAGGGGCGGAGGAGTGTGGGACTGCAAGCG         |                        |                   |
| cg14888846 | CCDC85       | 1.704                | 0.072         | 0.042            | Island            | Promoter     | 17         | 28443962              |     | GGATGAGAATCAGGCGACTTATTTTGGCCGAGGATTTTAAATGGT    |                        |                   |
| cg18658096 | AARS1        | 1.685                | 0.054         | 0.032            | Island            | Promoter     | 17         | 41116483              |     | TCAGCTGACACCAAGCGCATCTGACAGGCTGTGGAGGAGGCGAGC    |                        |                   |
| cg00319395 | RPAIN        | 1.661                | 0.037         | 0.022            | Island            | Promoter     | 17         | 5323036               |     | CGAGCTTCCGGGCGCTGCTCGGATTTGGCCGAACAGTGAAGTGGAGC  |                        |                   |
| cg26708638 | ZNF444       | 2.351                |               |                  |                   |              |            |                       |     |                                                  |                        |                   |



Supplementary Table 2.

Table S2 Chromosomal Localization of Methylated CpG Loci and in the Combined Chemo Group\*

| TargetID   | SYMBOL       | Log. Reg. P-Value | Chr. Band |
|------------|--------------|-------------------|-----------|
| cg17319787 | ZNF699       | 0.0003            | 19p13.2   |
| cg01703419 | Not assigned | 0.002             | 12q23.3   |
| cg02196694 | TOX          | 0.002             | 8q12.1    |
| cg04541675 | FAM71E1      | 0.002             | 19q13.33  |
| cg09876101 | WDR90        | 0.002             | 16p13.3   |
| cg14942918 | ONECUT3      | 0.002             | 19p13.3   |
| cg20071051 | NEK9         | 0.002             | 14q24.3   |
| cg22286978 | A1BG         | 0.002             | 19q13.43  |
| cg26708638 | ZNF444       | 0.002             | 19q13.43  |
| cg11162249 | NUDT16       | 0.008             | 3q22.1    |
| cg13904493 | MAP3K21      | 0.008             | 1q42.2    |
| cg14237711 | ZSCAN5A      | 0.008             | 19q13.43  |
| cg24133836 | AASS         | 0.008             | 7q31.32   |
| cg01141940 | RTN1         | 0.027             | 14q23.1   |
| cg02837212 | ETFB         | 0.077             | 19q13.41  |
| cg14262439 | TMEM132B     | 0.077             | 12q24.32  |
| cg21877656 | ZNF329       | 0.077             | 19q13.43  |
| cg02666184 | ETFB         | 0.187             | 19q13.41  |
| cg08193650 | ZFP36L2      | 0.187             | 2p21      |
| cg12589600 | GTF2F1       | 0.187             | 19p13.3   |
| cg10594709 | Not assigned | 0.380             | 8q24.3    |
| cg11070056 | PRMT6        | 0.380             | 1p13.3    |
| cg22884792 | WNT1         | 0.380             | 12q13.12  |
| cg18191418 | Not assigned | 0.661             | 3q21.3    |
| cg19429286 | ZNF699       | 0.661             | 19p13.2   |
| cg19899312 | Not assigned | 0.661             | 11q13.5   |
| cg01951637 | CBFA2T3      | 1.000             | 16q24.3   |
| cg08847533 | NEK9         | 1.000             | 14q24.3   |
| cg18892128 | Not assigned | 1.000             | 6p21.33   |
| cg26029997 | TREX1        | 1.000             | 3p21.31   |

\* Logistic regression p-value is based on median methylation for each individual CpG locus of the 30 marker set in the combined IBCSG + Institutional Chemo cohort (26 cases and 94 controls). Correction for multiple testing was not performed.

Supplementary Table 3.

| Table S3 Enrichment of CpG Loci Located on Chromosome 19                                   |                             |                                   |
|--------------------------------------------------------------------------------------------|-----------------------------|-----------------------------------|
| Marker Sets                                                                                | # Situated on Chromosome 19 | % (Enrichment)                    |
| Total array - 485577 loci                                                                  | 25521/485577                | 5.26 % probes specific for Ch. 19 |
| 100 locus recurrence marker set                                                            | 15/100                      | 15% (2.85 fold)                   |
| 30 locus recurrence marker set                                                             | 11/30                       | 36.7% (6.98 fold)                 |
| 14 loci of 30 marker set with significant association between recurrence and methylation * | 6/14                        | 42.9% (8.12 fold)                 |
| * Determined by by logistic regression, based on the median methylation level              |                             |                                   |
